# Supplementary material for: Exploration of immune-related genes in high and low tumor mutation burden groups of chromophobe renal cell carcinoma
Source: PubMed Central journal article supplement (PMC7378265; doi:10.1042/bsr20201491), 2020-07-23
Supplement: BSR-2020-1491_supp.pdf [file BSR-2020-1491_supp.pdf]

**Supplementary Table 1. DEGs were identified by comparing the high and low TMB groups.**

| <b>gene</b> | <b>conMean</b> | <b>treatMean</b> | <b>logFC</b> | <b>pValue</b> | <b>fdr</b> |
|-------------|----------------|------------------|--------------|---------------|------------|
| BUB1B       | 0.412921       | 1.438073         | 1.800198     | 5.91E-06      | 0.003079   |
| DEPDC1      | 0.07115        | 0.55248          | 2.95698      | 2.90E-05      | 0.0061     |
| ESPL1       | 0.154083       | 0.602601         | 1.967497     | 0.000403      | 0.028437   |
| SGO1        | 0.09083        | 0.417472         | 2.200441     | 2.38E-05      | 0.00578    |
| GTSE1       | 0.330921       | 1.520785         | 2.200256     | 4.56E-05      | 0.007129   |
| TEX22       | 0.295812       | 0.612507         | 1.050045     | 2.71E-05      | 0.0061     |
| PRPH        | 0.060289       | 0.405759         | 2.750662     | 7.53E-05      | 0.009807   |
| IQGAP3      | 0.158893       | 0.74652          | 2.23212      | 1.29E-05      | 0.004151   |
| OIP5        | 0.381052       | 0.944089         | 1.308933     | 5.91E-06      | 0.003079   |
| CDHR2       | 0.184838       | 0.387872         | 1.069318     | 0.000122      | 0.012611   |
| KIF2C       | 0.50051        | 1.77301          | 1.82473      | 0.000527      | 0.033904   |
| TOP2A       | 0.694169       | 3.510626         | 2.338369     | 0.000138      | 0.013805   |
| SPAG5       | 0.378773       | 1.413945         | 1.900321     | 6.65E-05      | 0.009099   |
| NDC80       | 0.33155        | 1.173204         | 1.823155     | 0.000586      | 0.035988   |
| CAMK2N2     | 0.051999       | 0.872207         | 4.068123     | 4.11E-05      | 0.006987   |
| C17orf53    | 0.201899       | 0.558489         | 1.467895     | 3.80E-06      | 0.002445   |
| MND1        | 0.742042       | 1.503842         | 1.01908      | 0.000556      | 0.034926   |
| ASF1B       | 1.303345       | 4.265269         | 1.710418     | 1.12E-05      | 0.003962   |
| TONSL       | 0.579797       | 1.222993         | 1.076797     | 4.86E-05      | 0.007285   |
| CENPF       | 0.312107       | 1.618519         | 2.374561     | 1.05E-05      | 0.003949   |
| NUSAP1      | 1.116088       | 4.083218         | 1.871256     | 1.82E-05      | 0.00497    |
| CDC20       | 0.782562       | 4.986412         | 2.671725     | 5.50E-06      | 0.003079   |
| CDCA5       | 0.654679       | 2.071007         | 1.661473     | 5.18E-05      | 0.007656   |
| KIF4A       | 0.379717       | 1.668915         | 2.135914     | 1.94E-05      | 0.005065   |
| CDCA2       | 0.148688       | 0.738638         | 2.312584     | 1.70E-05      | 0.004888   |
| NEK2        | 0.130077       | 0.841057         | 2.692834     | 6.83E-06      | 0.003249   |
| PCLAF       | 0.412138       | 1.450899         | 1.815748     | 0.000259      | 0.020686   |
| POC1A       | 1.199222       | 3.055887         | 1.349493     | 1.38E-05      | 0.004201   |
| CENPE       | 0.165869       | 0.581098         | 1.808735     | 0.000122      | 0.012611   |
| SULT1C3     | 1.632363       | 0.042709         | -5.25628     | 0.000942      | 0.048844   |
| RRM2        | 0.288366       | 1.478689         | 2.358344     | 0.000184      | 0.016243   |
| PIF1        | 0.079638       | 0.429751         | 2.431968     | 1.12E-05      | 0.003962   |
| RBM11       | 0.334279       | 0.141411         | -1.24116     | 0.000197      | 0.017008   |
| CDK1        | 0.69591        | 2.122753         | 1.608964     | 0.000155      | 0.015245   |
| SLC16A1     | 3.931963       | 8.11177          | 1.044767     | 1.38E-05      | 0.004201   |
| TRIP13      | 0.301378       | 1.088584         | 1.852804     | 0.000164      | 0.015331   |
| ZMYND10     | 0.103133       | 0.312395         | 1.598863     | 0.000403      | 0.028437   |
| KIFC1       | 0.423297       | 1.604954         | 1.92279      | 2.54E-05      | 0.005914   |
| CENPW       | 1.448968       | 4.104598         | 1.502215     | 2.90E-05      | 0.0061     |
| CDCA3       | 0.212035       | 0.815275         | 1.942988     | 1.10E-06      | 0.001205   |
| CCNA2       | 0.971127       | 2.822215         | 1.539096     | 3.76E-05      | 0.006977   |
| UBE2T       | 1.545001       | 3.95731          | 1.356913     | 4.28E-05      | 0.006987   |
| EIF4EBP1    | 5.876176       | 18.38878         | 1.645877     | 0.00076       | 0.042608   |
| ASPM        | 0.091522       | 0.571534         | 2.642653     | 3.10E-05      | 0.006391   |
| KIF23       | 0.409393       | 1.390652         | 1.764202     | 8.01E-05      | 0.010069   |
| NEIL3       | 0.065142       | 0.376853         | 2.532352     | 9.13E-08      | 0.000333   |
| EZH2        | 0.564379       | 1.550608         | 1.458097     | 3.80E-06      | 0.002445   |
| CCNB2       | 0.675592       | 2.923355         | 2.1134       | 9.13E-08      | 0.000333   |
| PLK1        | 0.310275       | 1.748328         | 2.494355     | 2.91E-07      | 0.000636   |
| PBK         | 0.56722        | 3.163265         | 2.479435     | 4.75E-06      | 0.002884   |
| TROAP       | 0.252344       | 1.335396         | 2.403807     | 6.22E-07      | 0.000973   |
| ANKRD65     | 0.73319        | 0.364449         | -1.00847     | 0.000231      | 0.019035   |
| TPX2        | 1.063401       | 5.654511         | 2.410716     | 3.27E-06      | 0.002445   |
| FAM83D      | 0.323762       | 1.666389         | 2.36372      | 3.53E-06      | 0.002445   |

|           |          |          |          |          |          |
|-----------|----------|----------|----------|----------|----------|
| UBE2S     | 3.486671 | 7.164141 | 1.038944 | 6.83E-06 | 0.003249 |
| APLP1     | 0.527874 | 1.609326 | 1.60819  | 9.61E-05 | 0.011187 |
| INHBE     | 0.244946 | 0.837988 | 1.774464 | 0.000471 | 0.0314   |
| CDC25A    | 0.446598 | 1.018365 | 1.189205 | 9.05E-05 | 0.010876 |
| CENPI     | 0.108856 | 0.42362  | 1.960348 | 8.01E-05 | 0.010069 |
| ANLN      | 0.367973 | 1.939302 | 2.397867 | 3.31E-05 | 0.006574 |
| TMEM63C   | 0.475727 | 1.294408 | 1.444086 | 0.000931 | 0.048514 |
| CDT1      | 1.655898 | 3.551219 | 1.100701 | 0.000841 | 0.045567 |
| IL20RB    | 0.069403 | 0.473551 | 2.770447 | 0.00076  | 0.042608 |
| CLGN      | 3.30024  | 10.37815 | 1.652907 | 0.000425 | 0.029636 |
| WDR62     | 0.143968 | 0.460008 | 1.675913 | 7.97E-07 | 0.001089 |
| STMN1     | 4.703173 | 10.37037 | 1.140761 | 8.47E-06 | 0.003563 |
| UHRF1     | 0.228155 | 0.906994 | 1.99108  | 7.08E-05 | 0.009331 |
| CDKN2C    | 1.508074 | 3.488628 | 1.209953 | 0.000885 | 0.046786 |
| NCAPG     | 0.256965 | 1.158674 | 2.172832 | 0.000231 | 0.019035 |
| DLGAP5    | 0.21362  | 1.309904 | 2.616344 | 3.03E-06 | 0.002445 |
| CDC25C    | 0.083604 | 0.446398 | 2.416694 | 0.000164 | 0.015331 |
| KIF18B    | 0.11862  | 0.739883 | 2.640946 | 3.53E-05 | 0.006769 |
| ARHGAP11A | 0.422766 | 1.791198 | 2.082994 | 2.44E-07 | 0.000636 |
| MKI67     | 0.368258 | 1.653794 | 2.166992 | 1.59E-05 | 0.004689 |
| QRFR      | 0.56936  | 0.077001 | -2.88639 | 0.000161 | 0.015331 |
| RAD54L    | 0.166649 | 0.509424 | 1.612051 | 2.90E-05 | 0.0061   |
| BIRC5     | 0.440444 | 2.632936 | 2.579642 | 6.22E-07 | 0.000973 |
| KIF15     | 0.137182 | 0.566535 | 2.046071 | 1.29E-05 | 0.004151 |
| FOXM1     | 0.832083 | 3.589322 | 2.108911 | 9.13E-08 | 0.000333 |
| STEAP1    | 0.249004 | 1.381779 | 2.472284 | 0.000349 | 0.025995 |
| SPC24     | 0.360068 | 1.517589 | 2.075439 | 4.28E-05 | 0.006987 |
| KIF20A    | 0.351274 | 1.880356 | 2.420338 | 2.08E-05 | 0.005291 |
| STEAP4    | 1.508639 | 0.614646 | -1.29542 | 0.000259 | 0.020686 |
| E2F2      | 0.083671 | 0.339212 | 2.019398 | 0.000184 | 0.016243 |
| MYBL2     | 0.35429  | 2.719174 | 2.940166 | 0.000164 | 0.015331 |
| MANEAL    | 1.614257 | 4.010293 | 1.312837 | 6.65E-05 | 0.009099 |
| UBE2C     | 4.296065 | 13.31937 | 1.632438 | 0.000259 | 0.020686 |
| BUB1      | 0.41591  | 1.531524 | 1.880624 | 5.87E-05 | 0.008345 |
| HJURP     | 0.127563 | 0.642495 | 2.332479 | 1.05E-05 | 0.003949 |
| PRC1      | 1.270378 | 3.74299  | 1.558933 | 7.89E-06 | 0.003451 |
| TEDC2     | 0.349657 | 0.931853 | 1.414163 | 1.05E-05 | 0.003949 |
| CEMIP     | 0.256387 | 5.559248 | 4.438498 | 0.000685 | 0.040284 |
| CDKN3     | 0.570865 | 3.000444 | 2.393955 | 2.81E-06 | 0.002445 |
| CEP55     | 0.271945 | 1.942988 | 2.83689  | 5.87E-05 | 0.008345 |
| NUF2      | 0.137878 | 0.662182 | 2.26384  | 7.34E-06 | 0.003346 |
| DSCC1     | 0.261019 | 0.725223 | 1.47427  | 0.000617 | 0.037299 |
| BEST1     | 0.358889 | 0.98518  | 1.456851 | 0.000102 | 0.011636 |
| NCAPH     | 0.255199 | 0.8503   | 1.736351 | 0.000556 | 0.034926 |
| MELK      | 0.328605 | 1.409314 | 2.100566 | 1.29E-05 | 0.004151 |
| PTTG1     | 0.970803 | 5.240227 | 2.432378 | 2.22E-05 | 0.00553  |
| DNASE1L3  | 4.049073 | 1.560327 | -1.37574 | 0.000184 | 0.016243 |
| CDC6      | 0.19329  | 0.5682   | 1.55563  | 0.00076  | 0.042608 |
| CDCA8     | 0.529942 | 2.222533 | 2.068298 | 3.31E-05 | 0.006574 |
| AURKB     | 0.221503 | 1.636721 | 2.885411 | 2.54E-05 | 0.005914 |
| SKA3      | 0.128803 | 0.510251 | 1.98604  | 0.000184 | 0.016243 |
| CENPA     | 0.158955 | 1.072694 | 2.754551 | 1.10E-06 | 0.001205 |
| KIF11     | 0.394239 | 1.153201 | 1.548501 | 4.86E-05 | 0.007285 |
| PKMYT1    | 0.201565 | 0.817447 | 2.01988  | 2.81E-06 | 0.002445 |
| PDGFRL    | 0.317206 | 1.4585   | 2.200993 | 0.000685 | 0.040284 |
| PSRC1     | 0.242555 | 0.68337  | 1.494357 | 0.000342 | 0.025628 |
| CCNB1     | 2.611652 | 8.502456 | 1.702917 | 7.08E-05 | 0.009331 |

|      |          |          |          |          |          |
|------|----------|----------|----------|----------|----------|
| E2F1 | 3.704407 | 8.588228 | 1.213118 | 5.52E-05 | 0.008046 |
| SKA1 | 0.152827 | 0.708747 | 2.213372 | 9.05E-05 | 0.010876 |

---

**Supplementary Table2. Correlation analysis between immune-related genes and the reported immune checkpoint genes (ICGs) in chRCC.**

| ICGs    | BIRC5  |         | PDGFRL |         | INHBE  |         | IL20RB |         |
|---------|--------|---------|--------|---------|--------|---------|--------|---------|
|         | Cor    | P-value | Cor    | P-value | Cor    | P-value | Cor    | P-value |
| CD8A    | -0.047 | 0.708   | 0.291  | *       | 0.035  | 0.778   | 0.122  | 0.33    |
| CD8B    | -0.139 | 0.265   | 0.254  | *       | 0.058  | 0.644   | 0.169  | 0.174   |
| CD3D    | -0.033 | 0.79    | 0.244  | *       | 0.066  | 0.6     | 0.168  | 0.177   |
| CD3E    | 0.001  | 0.992   | 0.289  | *       | 0.117  | 0.349   | 0.197  | 0.113   |
| CD2     | 0.01   | 0.934   | 0.292  | *       | 0.08   | 0.522   | 0.178  | 0.153   |
| CD19    | 0.015  | 0.905   | 0.236  | 0.0559  | 0.003  | 0.983   | 0.077  | 0.536   |
| CD79A   | -0.021 | 0.866   | 0.235  | 0.0572  | 0.056  | 0.655   | 0.214  | 0.085   |
| CD86    | -0.074 | 0.552   | 0.261  | *       | 0.088  | 0.48    | 0.122  | 0.327   |
| CSF1R   | -0.094 | 0.453   | 0.219  | 0.077   | 0.071  | 0.573   | 0.103  | 0.408   |
| CCL2    | -0.106 | 0.397   | 0.245  | *       | -0.018 | 0.883   | 0.13   | 0.297   |
| CD68    | -0.03  | 0.812   | 0.291  | *       | 0.047  | 0.71    | 0.134  | 0.283   |
| IL10    | -0.166 | 0.182   | 0.254  | *       | -0.076 | 0.544   | 0.06   | 0.633   |
| NOS2    | -0.115 | 0.356   | 0.145  | 0.245   | -0.191 | 0.124   | -0.085 | 0.495   |
| IRF5    | -0.006 | 0.962   | 0.166  | 0.184   | 0.116  | 0.353   | 0.074  | 0.556   |
| PTGS2   | -0.021 | 0.867   | 0.087  | 0.489   | -0.009 | 0.94    | 0.08   | 0.523   |
| CD163   | 0.095  | 0.449   | 0.332  | **      | 0.024  | 0.848   | 0.169  | 0.174   |
| VSIG4   | 0.185  | 0.137   | 0.414  | ***     | 0.126  | 0.313   | 0.262  | *       |
| MS4A4A  | -0.082 | 0.51    | 0.247  | *       | 0      | 0.999   | 0.119  | 0.341   |
| CEACAM8 | 0.103  | 0.408   | 0.091  | 0.467   | -0.071 | 0.569   | 0.003  | 0.982   |
| ITGAM   | -0.121 | 0.333   | 0.198  | 0.111   | 0.03   | 0.813   | 0.075  | 0.547   |
| CCR7    | -0.069 | 0.584   | 0.247  | *       | 0.086  | 0.493   | 0.135  | 0.278   |
| PDL1    | 0.118  | 0.346   | 0.273  | *       | 0.135  | 0.278   | 0.217  | 0.0808  |
| CTLA4   | 0.122  | 0.33    | 0.364  | **      | 0.199  | 0.109   | 0.193  | 0.121   |
| LAG3    | 0.051  | 0.686   | 0.286  | *       | 0.344  | **      | 0.256  | *       |
| HAVCR2  | -0.181 | 0.147   | 0.097  | 0.436   | -0.002 | 0.988   | -0.036 | 0.776   |
| GZMB    | -0.049 | 0.694   | 0.19   | 0.125   | 0.115  | 0.359   | 0.079  | 0.528   |
| PDCD1   | -0.037 | 0.768   | 0.245  | *       | 0.121  | 0.334   | 0.086  | 0.494   |

\*P<0.05, \*\*P<0.01, \*\*\*P<0.001
